# Supplementary material for: Deep Learning for Nasopharyngeal Carcinoma Segmentation in Magnetic Resonance Imaging: A Systematic Review and Meta-Analysis
Source: MDPI journal article supplement (doi:10.3390/bioengineering11050504), 2024-05-17
Supplement: s1 [file s1]

# Deep Learning for Nasopharyngeal Carcinoma Segmentation in MRI Imaging: A Systematic Review and Meta-Analysis

Chih-Keng Wang, Ting-Wei Wang, Ya-Xuan Yang, Yu-Te Wu

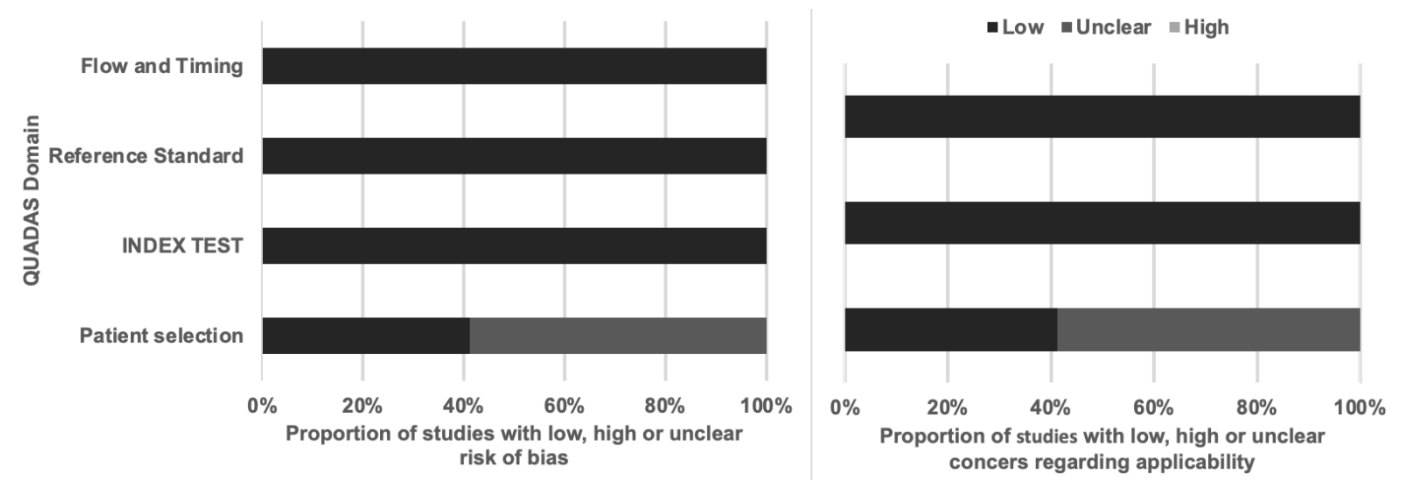

Figure S1. The results of QUADAS-2 quality assessment for included studies

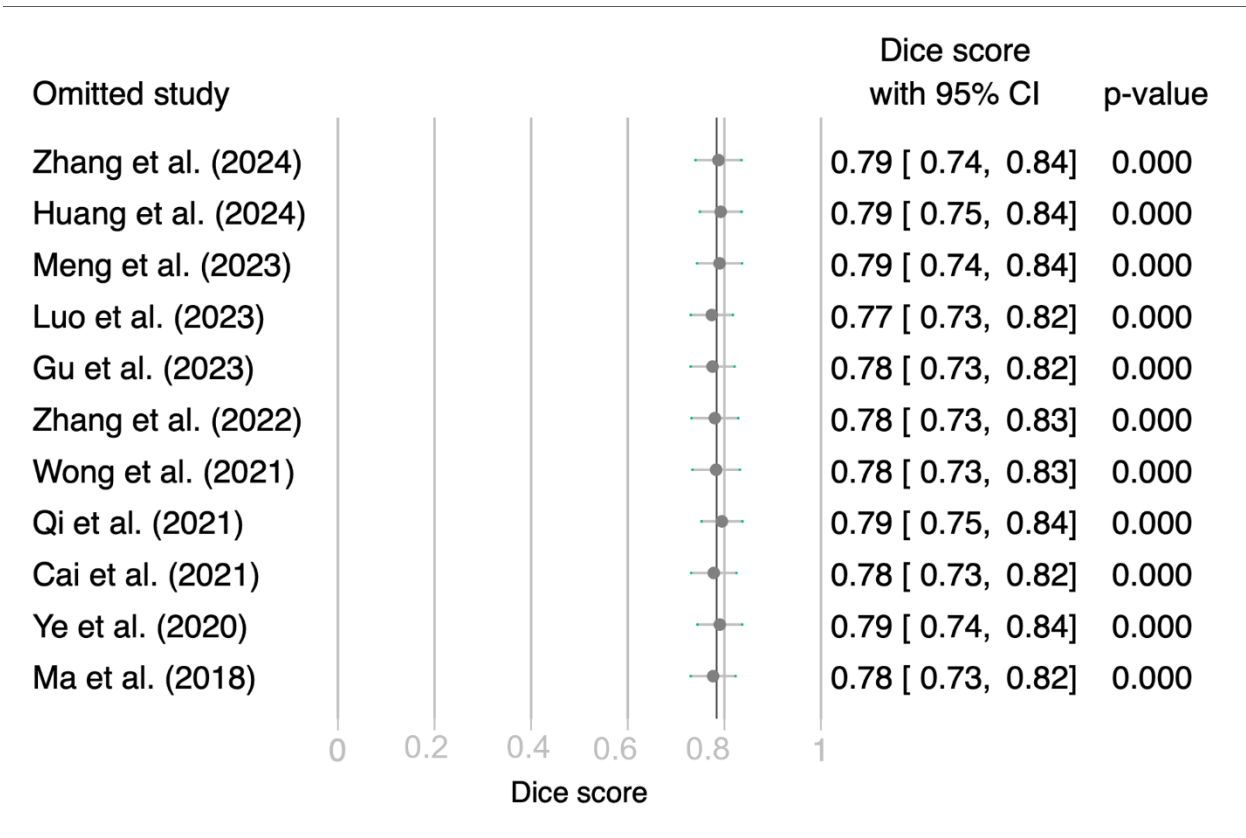

Figure S2. The results of a sensitivity analysis of deep learning algorithms in independent datasets using the one-study removal method.

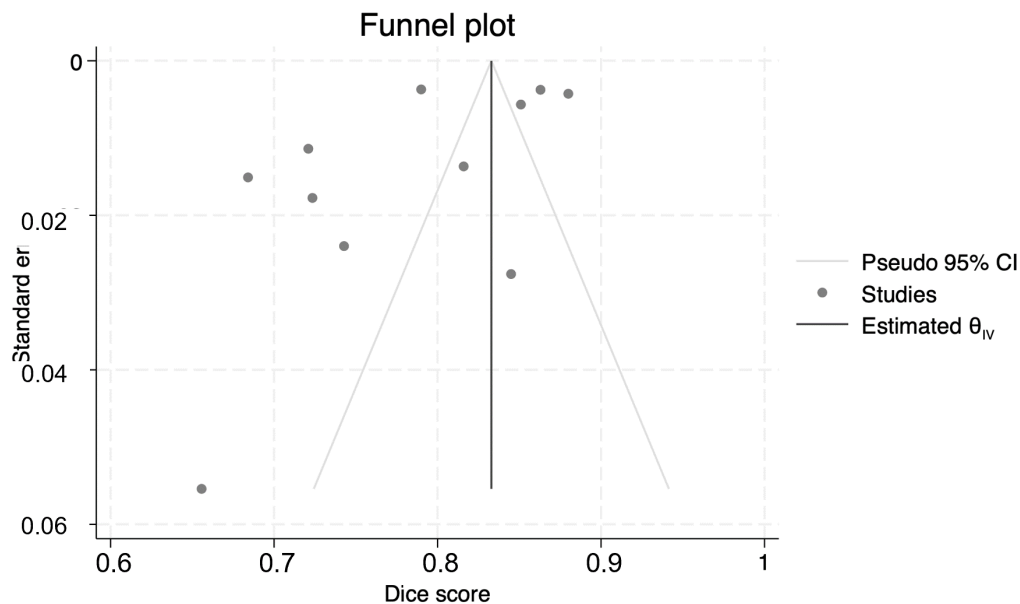

**Figure S3.** The funnel plot of Dice scores for deep learning algorithms in independent datasets. The  $p$  value of the Egger's test was 0.037 indicating present of publication bias.

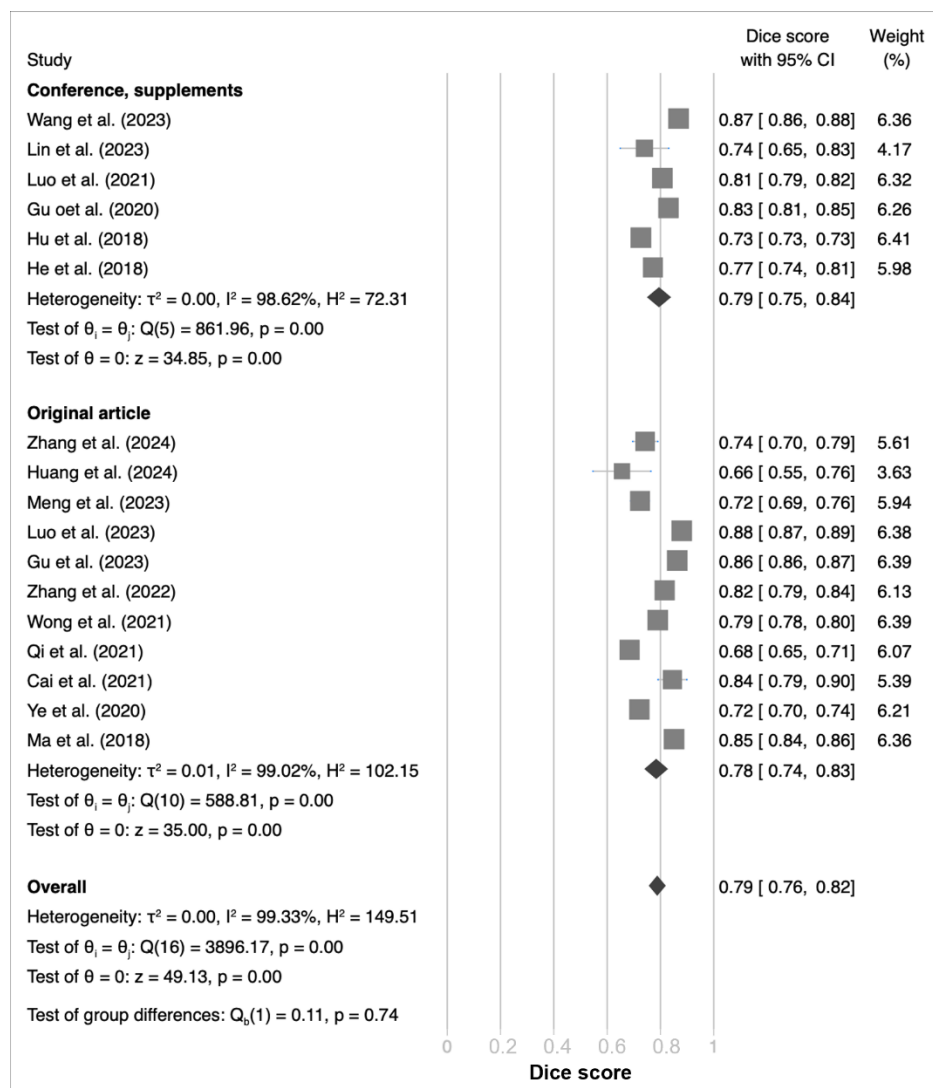

**Figure S4.** Forest plot of subgroup analysis deep learning algorithms in independent dataset using publication status as moderator

**Table S1.** PRISMA-DTA Abstract Checklist.

| Section/Topic                | Number | PRISMA-DTA for Abstracts Checklist Item                                                                                                                                                                                                               | Reported on Page # |
|------------------------------|--------|-------------------------------------------------------------------------------------------------------------------------------------------------------------------------------------------------------------------------------------------------------|--------------------|
| TITLE and PURPOSE            |        |                                                                                                                                                                                                                                                       |                    |
| Title                        | 1      | Identify the report as a systematic review (+/- meta-analysis) of diagnostic test accuracy (DTA) studies.                                                                                                                                             | 1                  |
| Objectives                   | 2      | Indicate the research question, including components such as participants, index test, and target conditions.                                                                                                                                         | 1                  |
| METHODS                      |        |                                                                                                                                                                                                                                                       |                    |
| Eligibility criteria         | 3      | Include study characteristics used as criteria for eligibility.                                                                                                                                                                                       | 1                  |
| Information sources          | 4      | List the key databases searched and the search dates.                                                                                                                                                                                                 | 1                  |
| Risk of bias & applicability | 5      | Indicate the methods of assessing risk of bias and applicability.                                                                                                                                                                                     | 1                  |
| Synthesis of results         | A1     |                                                                                                                                                                                                                                                       | 1                  |
| RESULTS                      |        |                                                                                                                                                                                                                                                       |                    |
| Included studies             | 6      | Indicate the number and type of included studies and the participants and relevant characteristics of the studies (including the reference standard).                                                                                                 | 1                  |
| Synthesis of results         | 7      | Include the results for the analysis of diagnostic accuracy, preferably indicating the number of studies and participants. Describe test accuracy including variability; if meta-analysis was done, include summary results and confidence intervals. | 1                  |
| DISCUSSION                   |        |                                                                                                                                                                                                                                                       |                    |
| Strengths and limitations    | 9      | Provide a brief summary of the strengths and limitations of the evidence                                                                                                                                                                              | 1                  |
| Interpretation.              | 10     | Provide a general interpretation of the results and the important implications.                                                                                                                                                                       | 1                  |
| OTHER                        |        |                                                                                                                                                                                                                                                       |                    |
| Funding                      | 11     | Indicate the primary source of funding for the review                                                                                                                                                                                                 | NA                 |
| Registration                 | 12     | Provide the registration number and the registry name                                                                                                                                                                                                 | NA                 |

Adapted From: McInnes MDF, Moher D, et al. The PRISMA-DTA Group (2018). Preferred Reporting Items for a Systematic Review and Meta-analysis of Diagnostic Test Accuracy Studies: The PRISMA-DTA Statement. JAMA. 2018 Jan 23;319(4):388-396. doi: 10.1001/jama.2017.19163.

**Table S2.** PRISMA-DTA Checklist.

| Section/Topic               | Number | PRISMA-DTA for Abstracts Checklist Item                                                                                                                                                                                                                                  | Reported on Page # |
|-----------------------------|--------|--------------------------------------------------------------------------------------------------------------------------------------------------------------------------------------------------------------------------------------------------------------------------|--------------------|
| TITLE and PURPOSE           |        |                                                                                                                                                                                                                                                                          |                    |
| Title                       | 1      | Identify the report as a systematic review (+/- meta-analysis) of diagnostic test accuracy (DTA) studies.                                                                                                                                                                | 1                  |
| Abstract                    | 2      | Abstract: See PRISMA-DTA for abstracts.                                                                                                                                                                                                                                  | 1                  |
| INTRODUCTION                |        |                                                                                                                                                                                                                                                                          |                    |
| Rationale                   | 3      | Describe the rationale for the review in the context of what is already known.                                                                                                                                                                                           | 1-2                |
| Clinical role of index test | D1     | State the scientific and clinical background, including the intended use and clinical role of the index test, and if applicable, the rationale for minimally acceptable test accuracy (or minimum difference in accuracy for comparative design).                        | 1-2                |
| Objectives                  | 4      | Provide an explicit statement of question(s) being addressed in terms of participants, index test(s), and target condition(s).                                                                                                                                           | 1-2                |
| METHODS                     |        |                                                                                                                                                                                                                                                                          |                    |
| Protocol and registration   | 5      | Indicate if a review protocol exists, if and where it can be accessed (e.g., Web address), and, if available, provide registration information including registration number.                                                                                            | 2                  |
| Eligibility criteria        | 6      | Specify study characteristics (participants, setting, index test(s), reference standard(s), target condition(s), and study design) and report characteristics (e.g., years considered, language, publication status) used as criteria for eligibility, giving rationale. | 2                  |

|                                 |    |                                                                                                                                                                                                                                                                                                                                                                                                                                          |      |
|---------------------------------|----|------------------------------------------------------------------------------------------------------------------------------------------------------------------------------------------------------------------------------------------------------------------------------------------------------------------------------------------------------------------------------------------------------------------------------------------|------|
| Information sources             | 7  | Describe all information sources (e.g., databases with dates of coverage, contact with study authors to identify additional studies) in the search and date last searched.                                                                                                                                                                                                                                                               | 2    |
| Search                          | 8  | Present full search strategies for all electronic databases and other sources searched, including any limits used, such that they could be repeated.                                                                                                                                                                                                                                                                                     | 2    |
| Study selection                 | 9  | State the process for selecting studies (i.e., screening, eligibility, included in systematic review, and, if applicable, included in the meta-analysis).                                                                                                                                                                                                                                                                                | 2    |
| Data collection process         | 10 | Describe method of data extraction from reports (e.g., piloted forms, independently, in duplicate) and any processes for obtaining and confirming data from investigators.                                                                                                                                                                                                                                                               | 2    |
| Definitions for data extraction | 11 | Provide definitions used in data extraction and classifications of target condition(s), index test(s), reference standard(s) and other characteristics (e.g. study design, clinical setting).                                                                                                                                                                                                                                            | 2    |
| Risk of bias and applicability  | 12 | Describe methods used for assessing risk of bias in individual studies and concerns regarding the applicability to the review question.                                                                                                                                                                                                                                                                                                  | 3    |
| Diagnostic accuracy measures    | 13 | State the principal diagnostic accuracy measure(s) reported (e.g. sensitivity, specificity) and state the unit of assessment (e.g. per-patient, per-lesion).                                                                                                                                                                                                                                                                             | 3    |
| Synthesis of results            | 14 | Describe methods of handling data, combining results of studies and describing variability between studies. This could include, but is not limited to: a) handling of multiple definitions of target condition. b) handling of multiple thresholds of test positivity, c) handling multiple index test readers, d) handling of indeterminate test results, e) grouping and comparing tests, f) handling of different reference standards | 3    |
| Meta-analysis                   | D2 | Report the statistical methods used for meta-analyses, if performed.                                                                                                                                                                                                                                                                                                                                                                     | 3    |
| Additional analyses             | 16 | Describe methods of additional analyses (e.g., sensitivity or subgroup analyses, meta-regression), if done, indicating which were pre-specified.                                                                                                                                                                                                                                                                                         | 3    |
| RESULTS                         |    |                                                                                                                                                                                                                                                                                                                                                                                                                                          |      |
| Study selection                 | 17 | Provide numbers of studies screened, assessed for eligibility, included in the review (and included in meta-analysis, if applicable) with reasons for exclusions at each stage, ideally with a flow diagram                                                                                                                                                                                                                              | 4    |
| Study characteristics           | 18 | For each included study provide citations and present key characteristics including: a) participant characteristics (presentation, prior testing), b) clinical setting, c) study design, d) target condition definition, e) index test, f) reference standard, g) sample size, h) funding sources                                                                                                                                        | 4-7  |
| Risk of bias and applicability  | 19 | Present evaluation of risk of bias and concerns regarding applicability for each study.                                                                                                                                                                                                                                                                                                                                                  | 7    |
| Results of individual studies   | 20 | For each analysis in each study (e.g. unique combination of index test, reference standard, and positivity threshold) report 2x2 data (TP, FP, FN, TN) with estimates of diagnostic accuracy and confidence intervals, ideally with a forest or receiver operator characteristic (ROC) plot.                                                                                                                                             | NA   |
| Synthesis of results            | 21 | Describe test accuracy, including variability; if meta-analysis was done, include results and confidence intervals                                                                                                                                                                                                                                                                                                                       | 7-8  |
| Additional analysis             | 23 | Give results of additional analyses, if done (e.g., sensitivity or subgroup analyses, meta-regression; analysis of index test: failure rates, proportion of inconclusive results, adverse events).                                                                                                                                                                                                                                       | 7-8  |
| DISCUSSION                      |    |                                                                                                                                                                                                                                                                                                                                                                                                                                          |      |
| Summary of evidence             | 24 | Summarize the main findings including the strength of evidence                                                                                                                                                                                                                                                                                                                                                                           | 9-10 |
| Limitations                     | 25 | Discuss limitations from included studies (e.g. risk of bias and concerns regarding applicability) and from the review process (e.g. incomplete retrieval of identified research).                                                                                                                                                                                                                                                       | 9-10 |
| Conclusions                     | 26 | Provide a general interpretation of the results in the context of other evidence. Discuss implications for future research and clinical practice (e.g. the intended use and clinical role of the index test)                                                                                                                                                                                                                             | 10   |
| OTHER                           |    |                                                                                                                                                                                                                                                                                                                                                                                                                                          |      |
| Funding                         | 27 | For the systematic review, describe the sources of funding and other support and the role of the funders                                                                                                                                                                                                                                                                                                                                 | 11   |

Adapted From: McInnes MDF, Moher D, et al. The PRISMA-DTA Group (2018). Preferred Reporting Items for a Systematic Review and Meta-analysis of Diagnostic Test Accuracy Studies: The PRISMA-DTA Statement. JAMA. 2018 Jan 23;319(4):388-396. doi: 10.1001/jama.2017.19163.

**Table S3.** Keywords and search results in different database

| Database       | Keyword                                                                                                                                                                                                                                                                | Date       | Results |
|----------------|------------------------------------------------------------------------------------------------------------------------------------------------------------------------------------------------------------------------------------------------------------------------|------------|---------|
| PubMed         | ((Nasopharyngeal Neoplasms OR Nasopharyngeal Cancer OR Nasopharyngeal Carcinoma OR Nasopharyngeal Tumors) AND (MRI OR magnetic resonance imaging OR MR ) AND (segmentation OR contouring OR delineation) AND (deep learning OR convolutional neural networks OR CNN) ) | 2024/03/20 | 36      |
| Embase         | ((Nasopharyngeal Neoplasms OR Nasopharyngeal Cancer OR Nasopharyngeal Carcinoma OR Nasopharyngeal Tumors) AND (MRI OR magnetic resonance imaging OR MR ) AND (segmentation OR contouring OR delineation) AND (deep learning OR convolutional neural networks OR CNN) ) | 2024/03/20 | 72      |
| Web of Science | ((Nasopharyngeal Neoplasms OR Nasopharyngeal Cancer OR Nasopharyngeal Carcinoma OR Nasopharyngeal Tumors) AND (MRI OR magnetic resonance imaging OR MR ) AND (segmentation OR contouring OR delineation) AND (deep learning OR convolutional neural networks OR CNN) ) | 2024/03/20 | 68      |

**Table S4.** Excluded article and reason.

| Title                                                                                                                                                                                                                                                   | Exclusion reason                               |                                                       |
|---------------------------------------------------------------------------------------------------------------------------------------------------------------------------------------------------------------------------------------------------------|------------------------------------------------|-------------------------------------------------------|
| Investigation of autosegmentation techniques on T2-weighted MRI for off-line dose reconstruction in MR-linac workflow for head and neck cancers [27]                                                                                                    | Outcome insufficient for quantitative analysis | No confidence interval or interquartile rage reported |
| Full-scale attention network for automated organ segmentation on head and neck CT and MR images [28]                                                                                                                                                    | Outcome not related to interest                | No nasopharyngeal cancer segmentation reported        |
| Deep Learning-Based Multi-Modality Segmentation of Primary Gross Tumor Volume in CT and MRI for Nasopharyngeal Carcinoma [29]                                                                                                                           | Outcome insufficient for quantitative analysis | No confidence interval or interquartile rage reported |
| DCTR U-Net: automatic segmentation algorithm for medical images of nasopharyngeal cancer in the context of deep learning [30]                                                                                                                           | Outcome insufficient for quantitative analysis | No confidence interval or interquartile rage reported |
| Automatic Head-and-Neck Tumor Segmentation in MRI via an End-to-End Adversarial Network [31]                                                                                                                                                            | Outcome insufficient for quantitative analysis | No confidence interval or interquartile rage reported |
| Automatic detection and recognition of nasopharynx gross tumour volume (GTVnx) by deep learning for nasopharyngeal cancer radiotherapy through magnetic resonance imaging [32]                                                                          | Outcome not related to interest                | Dice score not reported                               |
| Advancing Delineation of Gross Tumor Volume Based on Magnetic Resonance Imaging by Performing Source-Free Domain Adaptation in Nasopharyngeal Carcinoma [33]                                                                                            | Conference                                     |                                                       |
| Young oncologists benefit more than experts from deep learning-based organs-at-risk contouring modeling in nasopharyngeal carcinoma radiotherapy: A multi-institution clinical study exploring working experience and institute group style factor [34] | Outcome not related to interest                | No nasopharyngeal cancer segmentation reported        |

|                                                                                                                                                                                         |                                                |                                                       |
|-----------------------------------------------------------------------------------------------------------------------------------------------------------------------------------------|------------------------------------------------|-------------------------------------------------------|
| Objective Boundary Generation for Gross Target Volume and Organs at Risk Using 3D Multi-Modal Medical Images [35]                                                                       | Outcome insufficient for quantitative analysis | No confidence interval or interquartile rage reported |
| Deep Learning-Based Synthesis of Contrast-Enhanced MRI for Automated Delineation of Primary Gross Tumor Volume in Radiotherapy of Nasopharyngeal Carcinoma [36]                         | Supplement                                     |                                                       |
| Automatic tumor segmentation and metachronous single-organ metastasis prediction of nasopharyngeal carcinoma patients based on multi-sequence magnetic resonance imaging [37]           | Outcome not related to interest                | Dice score not reported                               |
| MSU-Net: Multi-scale Sensitive U-Net based on pixel-edge-region level collaborative loss for nasopharyngeal MRI segmentation [38]                                                       | Outcome insufficient for quantitative analysis | No confidence interval or interquartile rage reported |
| Dual-feature Fusion Attention Network for Small Object Segmentation [39]                                                                                                                | Outcome insufficient for quantitative analysis | No confidence interval or interquartile rage reported |
| Automated Segmentation of Nasopharyngeal Carcinoma Based on Dual-Sequence Magnetic Resonance Imaging Using Self-supervised Learning [40]                                                | Outcome insufficient for quantitative analysis | No confidence interval or interquartile rage reported |
| Application of Artificial Intelligence in Radiotherapy of Nasopharyngeal Carcinoma with Magnetic Resonance Imaging [41]                                                                 | Retracted                                      |                                                       |
| Patient-Specific Daily Updated Deep Learning Auto-Segmentation for MRI-Guided Adaptive Radiotherapy [42]                                                                                | Outcome not related to interest                | No nasopharyngeal cancer segmentation reported        |
| MRI-guided Automated Delineation of Gross Tumor Volume for Nasopharyngeal Carcinoma using Deep Learning [43]                                                                            | Outcome insufficient for quantitative analysis | No confidence interval or interquartile rage reported |
| Multiscale Local Enhancement Deep Convolutional Networks for the Automated 3D Segmentation of Gross Tumor Volumes in Nasopharyngeal Carcinoma: A Multi-Institutional Dataset Study [44] | Not MRI                                        |                                                       |
| SeqSeg: A sequential method to achieve nasopharyngeal carcinoma segmentation free from background dominance [45]                                                                        | Outcome insufficient for quantitative analysis | No confidence interval or interquartile rage reported |
| Convolutional Neural Network in Evaluation of Radiotherapy Effect for Nasopharyngeal Carcinoma [46]                                                                                     | Outcome insufficient for quantitative analysis | No confidence interval or interquartile rage reported |
| Multidimensional CNN-Based Deep Segmentation Method for Tumor Identification [47]                                                                                                       | Retracted                                      |                                                       |
| NPCFORMER: AUTOMATIC NASOPHARYNGEAL CARCINOMA SEGMENTATION BASED ON BOUNDARY ATTENTION AND GLOBAL POSITION CONTEXT ATTENTION [48]                                                       | Outcome insufficient for quantitative analysis | No confidence interval or interquartile rage reported |
| A multi-perspective information aggregation network for automatedT-staging detection of nasopharyngeal carcinoma [49]                                                                   | Outcome insufficient for quantitative analysis | No confidence interval or interquartile rage reported |

|                                                                                                                                                                                                                                                       |                                                |                                                        |
|-------------------------------------------------------------------------------------------------------------------------------------------------------------------------------------------------------------------------------------------------------|------------------------------------------------|--------------------------------------------------------|
| Patient-specific daily updated deep learning auto-segmentation for MRI-guided adaptive radiotherapy [50]                                                                                                                                              | Outcome not related to interest                | No nasopharyngeal cancer segmentation reported         |
| Virtual Contrast-Enhanced Magnetic Resonance Images Synthesis for Patients With Nasopharyngeal Carcinoma Using Multimodality-Guided Synergistic Neural Network [51]                                                                                   | Outcome insufficient for quantitative analysis | No confidence interval or interquartile range reported |
| Anatomical Partition-Based Deep Learning: An Automatic Nasopharyngeal MRI Recognition Scheme [52]                                                                                                                                                     | Outcome not related to interest                | No nasopharyngeal cancer segmentation reported         |
| Quantitative Comparisons of Deep-learning-based and Atlas-based Auto-segmentation of the Intermediate Risk Clinical Target Volume for Nasopharyngeal Carcinoma [53]                                                                                   | Not MRI                                        |                                                        |
| The contrast-enhanced MRI can be substituted by unenhanced MRI in identifying and automatically segmenting primary nasopharyngeal carcinoma with the aid of deep learning models: An exploratory study in large-scale population of endemic area [54] | Outcome not related to interest                | Dice score not reported                                |
| A Novel Fully Automated MRI-Based Deep-Learning Method for Segmentation of Nasopharyngeal Carcinoma Lymph Nodes [55]                                                                                                                                  | Outcome not related to interest                | lymph node segmentation                                |
| A Preliminary Experience of Implementing Deep-Learning Based Auto-Segmentation in Head and Neck Cancer: A Study on Real-World Clinical Cases [56]                                                                                                     | Outcome not related to interest                | No nasopharyngeal cancer segmentation reported         |
| AccuLearning: A User-Friendly Deep Learning Auto-Segmentation Platform for Radiotherapy [57]                                                                                                                                                          | Outcome not related to interest                | No nasopharyngeal cancer segmentation reported         |
| Convolutional Neural Network Intelligent Segmentation Algorithm-Based Magnetic Resonance Imaging in Diagnosis of Nasopharyngeal Carcinoma Foci [58]                                                                                                   | Outcome insufficient for quantitative analysis | No clear data splitting sample reported                |
| DA-DSUnet: Dual Attention-based Dense SU-net for automatic head-and-neck tumor segmentation in MRI images [8]                                                                                                                                         | Outcome insufficient for quantitative analysis | No confidence interval or interquartile range reported |
| Artificial intelligence-based bone-enhanced magnetic resonance image-a computed tomography/magnetic resonance image composite image modality in nasopharyngeal carcinoma radiotherapy [59]                                                            | Outcome insufficient for quantitative analysis | No confidence interval or interquartile range reported |
| MRI-Only Radiotherapy Planning for Nasopharyngeal Carcinoma Using Deep Learning [60]                                                                                                                                                                  | Outcome not related to interest                | Dice score not reported                                |
| Efficient Semi-supervised Gross Target Volume of Nasopharyngeal Carcinoma Segmentation via Uncertainty Rectified Pyramid Consistency [61]                                                                                                             | Conference                                     |                                                        |
| Head-Neck Cancer Delineation [62]                                                                                                                                                                                                                     | Review                                         |                                                        |

|                                                                                                                                                                                |                                                |                                                        |
|--------------------------------------------------------------------------------------------------------------------------------------------------------------------------------|------------------------------------------------|--------------------------------------------------------|
| DCNet: Densely Connected Deep Convolutional Encoder-Decoder Network for Nasopharyngeal Carcinoma Segmentation [63]                                                             | Outcome insufficient for quantitative analysis | No confidence interval or interquartile range reported |
| A deep learning approach to segmentation of nasopharyngeal carcinoma using computed tomography [64]                                                                            | Not MRI                                        |                                                        |
| Sequential and Iterative Auto-Segmentation of High-Risk Clinical Target Volume for Radiotherapy of Nasopharyngeal Carcinoma in Planning CT Images [65]                         | Not MRI                                        |                                                        |
| Auto-segmentation of organs at risk for head and neck radiotherapy planning: From atlas-based to deep learning methods [66]                                                    | Review                                         |                                                        |
| Coarse-to-fine Nasopharyngeal Carcinoma Segmentation in MRI via Multi-stage Rendering [67]                                                                                     | Outcome insufficient for quantitative analysis | No confidence interval or interquartile range reported |
| Automatic Segmentation Of Nasopharyngeal Carcinoma On MR Images: A Single-Institution Experience [68]                                                                          | Supplement                                     |                                                        |
| automatic segmentation of nasopharyngeal carcinoma: a solution for single institution [69]                                                                                     | Supplement                                     |                                                        |
| Image segmentation of nasopharyngeal carcinoma using 3D CNN with long-range skip connection and multi-scale feature pyramid [70]                                               | Outcome insufficient for quantitative analysis | No confidence interval or interquartile range reported |
| Combining Images and Clinical Diagnostic Information to Improve Automatic Segmentation of Nasopharyngeal Carcinoma Tumors on MR Images [71]                                    | Supplement                                     |                                                        |
| A deep learning based auto-segmentation for GTVs on NPC MR images [72]                                                                                                         | Not MRI                                        |                                                        |
| Deep-learning automatic delineation of primary tumour volume in nasopharyngeal carcinoma on T2W fat-suppressed MR images [73]                                                  | Outcome insufficient for quantitative analysis | No confidence interval or interquartile range reported |
| Nasopharyngeal carcinoma segmentation based on enhanced convolutional neural networks using multi-modal metric learning [74]                                                   | Not MRI                                        |                                                        |
| Achieving Accurate Segmentation of Nasopharyngeal Carcinoma in MR Images Through Recurrent Attention [75]                                                                      | Outcome insufficient for quantitative analysis | No confidence interval or interquartile range reported |
| Automatic Tumor Segmentation with Deep Convolutional Neural Networks for Radiotherapy Applications [76]                                                                        | Outcome insufficient for quantitative analysis | No confidence interval or interquartile range reported |
| Development and Validation of A Deep Learning Algorithm for Automated Delineation of Primary Tumor for Nasopharyngeal Carcinoma from Multimodal Magnetic Resonance Images [77] | Supplement                                     |                                                        |
| A DISCRIMINATIVE LEARNING BASED APPROACH FOR AUTOMATED NASOPHARYNGEAL CARCINOMA                                                                                                | Not MRI                                        |                                                        |

SEGMENTATION LEVERAGING MULTI-MODALITY

SIMILARITY METRIC LEARNING [78]

|                                                                                                                                  |                                                |                                                       |  |
|----------------------------------------------------------------------------------------------------------------------------------|------------------------------------------------|-------------------------------------------------------|--|
| A 2.5D Cancer Segmentation for MRI Images Based on U-Net[79]                                                                     | Conference                                     |                                                       |  |
| A 3D Dual Path U-Net of Cancer Segmentation Based on MRI [80]                                                                    | Conference                                     |                                                       |  |
| Deep Deconvolutional Neural Network for Target Segmentation of Nasopharyngeal Cancer in Planning Computed Tomography Images [81] | Outcome insufficient for quantitative analysis | No confidence interval or interquartile rage reported |  |
| Automatic Nasopharyngeal Carcinoma Segmentation in MR Images with Convolutional Neural Networks [82]                             | Conference                                     |                                                       |  |

**Table S5.** Comparison of multilevel meta-analysis model clusters with datasets of segmentation Dice scores across all validation sets.

|                                      | df | AIC     | BIC     | Log likelihood | LRT   | p-value |
|--------------------------------------|----|---------|---------|----------------|-------|---------|
| Three-level model                    | 3  | -107.53 | -100.96 | 56.76          |       |         |
| Within-studies variance constrained  | 2  | -109.53 | -105.15 | 56.76          | 0.00  | 1.00    |
| Between-studies variance constrained | 2  | -97.15  | -92.77  | 50.57          | 12.38 | <0.01   |
| Both variance components constrained | 1  | -93.35  | -91.16  | 47.67          | 18.18 | <0.01   |

**Table S6.** Quality assessment according to the Quality Assessment of Diagnostic Accuracy Studies 2 (QUADAS-2) criteria

| Source                     | Risk of bias       |              |                          |                             |                        |                                         |                     |                      |                              |                         |                       | Concern of applicability |            |                    |
|----------------------------|--------------------|--------------|--------------------------|-----------------------------|------------------------|-----------------------------------------|---------------------|----------------------|------------------------------|-------------------------|-----------------------|--------------------------|------------|--------------------|
|                            | Patient selection: |              |                          | INDEX TEST                  |                        | Reference Standard                      |                     |                      | Flow and Timing              |                         |                       | Patient selection        | INDEX TEST | Reference Standard |
|                            | Consecutive        | Case-control | Inappropriate exclusions | Blind to reference standard | Threshold prespecified | Correctly classify the target condition | Blind to index test | Appropriate interval | Receive a reference standard | Same reference standard | All patients analyzed |                          |            |                    |
| Zhang et al. (2024) [83]   | Unclear            | No           | No                       | Yes                         | Yes                    | Yes                                     | Yes                 | Yes                  | Yes                          | Yes                     | Yes                   | Unclear                  | Low        | Low                |
| Huang et al. (2024) [84]   | Unclear            | No           | No                       | Yes                         | Yes                    | Yes                                     | Yes                 | Yes                  | Yes                          | Yes                     | Yes                   | Unclear                  | Low        | Low                |
| Meng et al. (2023) [85]    | Unclear            | No           | No                       | Yes                         | Yes                    | Yes                                     | Yes                 | Yes                  | Yes                          | Yes                     | Yes                   | Unclear                  | Low        | Low                |
| Luo et al. (2023) [86]     | Unclear            | No           | No                       | Yes                         | Yes                    | Yes                                     | Yes                 | Yes                  | Yes                          | Yes                     | Yes                   | Unclear                  | Low        | Low                |
| Gu et al. (2023) [87]      | Unclear            | No           | No                       | Yes                         | Yes                    | Yes                                     | Yes                 | Yes                  | Yes                          | Yes                     | Yes                   | Unclear                  | Low        | Low                |
| Zhang et al. (2022) [88]   | Unclear            | No           | No                       | Yes                         | Yes                    | Yes                                     | Yes                 | Yes                  | Yes                          | Yes                     | Yes                   | Unclear                  | Low        | Low                |
| Liu et al. (2022) [89]     | Unclear            | No           | No                       | Yes                         | Yes                    | Yes                                     | Yes                 | Yes                  | Yes                          | Yes                     | Yes                   | Unclear                  | Low        | Low                |
| Li et al. (2022) [90]      | Yes                | No           | No                       | Yes                         | Yes                    | Yes                                     | Yes                 | Yes                  | Yes                          | Yes                     | Yes                   | Low                      | Low        | Low                |
| Wong et al. (2021) I [91]  | Yes                | No           | No                       | Yes                         | Yes                    | Yes                                     | Yes                 | Yes                  | Yes                          | Yes                     | Yes                   | Low                      | Low        | Low                |
| Wong et al. (2021) II [92] | Yes                | No           | No                       | Yes                         | Yes                    | Yes                                     | Yes                 | Yes                  | Yes                          | Yes                     | Yes                   | Low                      | Low        | Low                |
| Qi et al. (2021) [93]      | Unclear            | No           | No                       | Yes                         | Yes                    | Yes                                     | Yes                 | Yes                  | Yes                          | Yes                     | Yes                   | Unclear                  | Low        | Low                |
| Cai et al. (2021) [94]     | Yes                | No           | No                       | Yes                         | Yes                    | Yes                                     | Yes                 | Yes                  | Yes                          | Yes                     | Yes                   | Low                      | Low        | Low                |
| Ye et al. (2020) [12]      | Unclear            | No           | No                       | Yes                         | Yes                    | Yes                                     | Yes                 | Yes                  | Yes                          | Yes                     | Yes                   | Unclear                  | Low        | Low                |
| Ke et al. (2020) [95]      | Yes                | No           | No                       | Yes                         | Yes                    | Yes                                     | Yes                 | Yes                  | Yes                          | Yes                     | Yes                   | Low                      | Low        | Low                |
| Lin et al. (2019) [96]     | Yes                | No           | No                       | Yes                         | Yes                    | Yes                                     | Yes                 | Yes                  | Yes                          | Yes                     | Yes                   | Low                      | Low        | Low                |
| Ma et al. (2018) [97]      | Unclear            | No           | No                       | Yes                         | Yes                    | Yes                                     | Yes                 | Yes                  | Yes                          | Yes                     | Yes                   | Unclear                  | Low        | Low                |
| Li et al. (2018) [11]      | Yes                | No           | No                       | Yes                         | Yes                    | Yes                                     | Yes                 | Yes                  | Yes                          | Yes                     | Yes                   | Low                      | Low        | Low                |

**Table S7.** The Checklist for Artificial Intelligence in Medical Imaging scores.

| Source                     | Title/Abstract | Introduction | Methods      |      |              |                  |       |          |            | Results |                   | Discussion | Other Information | Total Score |
|----------------------------|----------------|--------------|--------------|------|--------------|------------------|-------|----------|------------|---------|-------------------|------------|-------------------|-------------|
|                            |                |              | Study design | Data | Ground truth | Data preparation | Model | Training | Evaluation | Data    | Model performance |            |                   |             |
|                            |                |              |              |      |              |                  |       |          |            |         |                   |            |                   |             |
|                            | (2)            | (2)          | (2)          | (7)  | (5)          | (3)              | (3)   | (3)      | (5)        | (2)     | (3)               | (2)        | (3)               | (42)        |
| Zhang et al. (2024) [83]   | 1              | 2            | 2            | 4    | 1            | 2                | 1     | 2        | 4          | 0       | 2                 | 2          | 1                 | 24          |
| Huang et al. (2024) [84]   | 1              | 2            | 2            | 4    | 2            | 2                | 2     | 2        | 4          | 0       | 2                 | 2          | 1                 | 26          |
| Meng et al. (2023) [85]    | 2              | 2            | 2            | 4    | 1            | 2                | 3     | 2        | 4          | 0       | 2                 | 2          | 1                 | 27          |
| Luo et al. (2023) [86]     | 2              | 2            | 2            | 5    | 3            | 2                | 2     | 3        | 5          | 2       | 2                 | 2          | 1                 | 33          |
| Gu et al. (2023) [87]      | 2              | 2            | 2            | 4    | 1            | 2                | 1     | 2        | 2          | 0       | 2                 | 2          | 1                 | 23          |
| Zhang et al. (2022) [88]   | 2              | 2            | 2            | 3    | 1            | 2                | 1     | 1        | 4          | 0       | 3                 | 2          | 1                 | 24          |
| Liu et al. (2022) [89]     | 2              | 2            | 2            | 4    | 0            | 2                | 1     | 1        | 3          | 0       | 2                 | 2          | 1                 | 22          |
| Li et al. (2022) [90]      | 1              | 2            | 2            | 6    | 3            | 2                | 3     | 2        | 4          | 1       | 2                 | 2          | 0                 | 30          |
| Wong et al. (2021) I [91]  | 2              | 2            | 2            | 6    | 4            | 2                | 2     | 2        | 4          | 1       | 2                 | 2          | 1                 | 32          |
| Wong et al. (2021) II [92] | 2              | 2            | 2            | 6    | 4            | 2                | 2     | 2        | 4          | 1       | 2                 | 2          | 1                 | 32          |
| Qi et al. (2021) [93]      | 1              | 2            | 2            | 4    | 3            | 2                | 1     | 1        | 3          | 0       | 2                 | 2          | 1                 | 24          |
| Cai et al. (2021) [94]     | 1              | 2            | 2            | 4    | 2            | 2                | 2     | 1        | 4          | 1       | 2                 | 2          | 0                 | 25          |
| Ye et al. (2020) [12]      | 1              | 2            | 2            | 3    | 3            | 2                | 2     | 2        | 3          | 0       | 2                 | 1          | 1                 | 24          |
| Ke et al. (2020) [95]      | 2              | 2            | 2            | 7    | 4            | 2                | 1     | 1        | 4          | 2       | 3                 | 2          | 1                 | 33          |
| Lin et al. (2019) [96]     | 2              | 2            | 2            | 5    | 4            | 2                | 2     | 2        | 4          | 2       | 2                 | 2          | 1                 | 32          |
| Ma et al. (2018) [97]      | 2              | 2            | 2            | 4    | 2            | 2                | 1     | 2        | 4          | 0       | 2                 | 2          | 1                 | 26          |
| Li et al. (2018) [11]      | 2              | 2            | 2            | 4    | 4            | 2                | 2     | 1        | 4          | 0       | 2                 | 2          | 1                 | 28          |
